# Supplementary material for: Genomewide Mutational Diversity in Escherichia coli Population Evolving in Prolonged Stationary Phase
Source: PubMed Central journal article supplement (PMC5444009; doi:10.1128/msphere.00059-17), 2017-05-24
Supplement: sph003172291st1.pdf [file sph003172291st1.pdf]

|    | Position | Mutation   | Annotation                 | Gene            | Function                                                                                                                                                                                                                                                                                                                                                                                                                                                                                                                                                                                                                                                                                                                                                                                                                                                                                                                                                                                                                                                                                                                                                   |
|----|----------|------------|----------------------------|-----------------|------------------------------------------------------------------------------------------------------------------------------------------------------------------------------------------------------------------------------------------------------------------------------------------------------------------------------------------------------------------------------------------------------------------------------------------------------------------------------------------------------------------------------------------------------------------------------------------------------------------------------------------------------------------------------------------------------------------------------------------------------------------------------------------------------------------------------------------------------------------------------------------------------------------------------------------------------------------------------------------------------------------------------------------------------------------------------------------------------------------------------------------------------------|
| 1  | 66457    | C→A        | V32F (GTT→TTT)             | araD ←          | L-ribulose-5-phosphate 4-epimerase                                                                                                                                                                                                                                                                                                                                                                                                                                                                                                                                                                                                                                                                                                                                                                                                                                                                                                                                                                                                                                                                                                                         |
| 2  | 97880    | C→T        | S265F (TCC→TTC)            | murD →          | UDP-N-acetylmuramoyl-L-alanine:D-glutamate ligase                                                                                                                                                                                                                                                                                                                                                                                                                                                                                                                                                                                                                                                                                                                                                                                                                                                                                                                                                                                                                                                                                                          |
| 3  | 167632   | C→A        | P50Q (CCG→CAG)             | fhuA →          | ferrichrome outer membrane transporter                                                                                                                                                                                                                                                                                                                                                                                                                                                                                                                                                                                                                                                                                                                                                                                                                                                                                                                                                                                                                                                                                                                     |
| 4  | 274547   | A→G        | intergenic (-206/-2)       | insH ← / → mmuP | ISS transposase and trans-activator/S-methylmethionine transporter                                                                                                                                                                                                                                                                                                                                                                                                                                                                                                                                                                                                                                                                                                                                                                                                                                                                                                                                                                                                                                                                                         |
| 5  | 274733   | Δ97,240 bp |                            | [mmuP]-[mhpD]   | 90 genes: [mmuP], mmuM, afuC, afuB, insB, insA, ykgN, yagB, yagA, yagE, yagF, yagG, yagH, yagI, argF, insB, insA, yagJ, yagK, yagL, yagM, yagN, intF, yagP, yagQ, yagR, yagS, yagT, yagU, ykgJ, yagV, yagW, yagX, yagY, yagZ, ykgK, ykgL, Y75_p4288, Y75_p4289, eaeH, insE, insF, ykgA, ykgB, ykgI, ykgC, ykgD, ykgE, ykgF, ykgG, ykgH, betA, betB, betL, betT, yahA, yahB, yahC, yahD, yahE, yahF, yahG, yahH, yahI, yahJ, yahK, yahL, yahM, yahN, yahO, prpR, prpB, prpC, prpD, prpE, codB, codA, cynR, cynT, cynS, cynX, lacA, lacY, lacZ, lacI, mhpR, mhpA, mhpB, mhpC, [mhpD][mmuP], mmuM, afuC, afuB, insB, insA, ykgN, yagB, yagA, yagE, yagF, yagG, yagH, yagI, argF, insB, insA, yagJ, yagK, yagL, yagM, yagN, intF, yagP, yagQ, yagR, yagS, yagT, yagU, ykgJ, yagV, yagW, yagX, yagY, yagZ, ykgK, ykgL, Y75_p4288, Y75_p4289, eaeH, insE, insF, ykgA, ykgB, ykgI, ykgC, ykgD, ykgE, ykgF, ykgG, ykgH, betA, betB, betL, betT, yahA, yahB, yahC, yahD, yahE, yahF, yahG, yahH, yahI, yahJ, yahK, yahL, yahM, yahN, yahO, prpR, prpB, prpC, prpD, prpE, codB, codA, cynR, cynT, cynS, cynX, lacA, lacY, lacZ, lacI, mhpR, mhpA, mhpB, mhpC, [mhpD] |
| 6  | 547694   | A→G        | intergenic (+123/-1156)    | fdrA → / → ylbF | acyl-CoA synthetase with NAD(P)-binding Rossmann-fold domain/hypothetical protein                                                                                                                                                                                                                                                                                                                                                                                                                                                                                                                                                                                                                                                                                                                                                                                                                                                                                                                                                                                                                                                                          |
| 7  | 547831   | +G         | intergenic (+260/-1019)    | fdrA → / → ylbF | acyl-CoA synthetase with NAD(P)-binding Rossmann-fold domain/hypothetical protein                                                                                                                                                                                                                                                                                                                                                                                                                                                                                                                                                                                                                                                                                                                                                                                                                                                                                                                                                                                                                                                                          |
| 8  | 556858   | A→T        | L36Q (CTG→CAG)             | folD ←          | bifunctional 5,10-methylene-tetrahydrofolate dehydrogenase/5,10-methylene-tetrahydrofolate cyclohydrolase                                                                                                                                                                                                                                                                                                                                                                                                                                                                                                                                                                                                                                                                                                                                                                                                                                                                                                                                                                                                                                                  |
| 9  | 569996   | G→C        | intergenic (+345/-120)     | ybcK → / → ybcL | recombinase/kinase inhibitor                                                                                                                                                                                                                                                                                                                                                                                                                                                                                                                                                                                                                                                                                                                                                                                                                                                                                                                                                                                                                                                                                                                               |
| 10 | 654214   | Δ1,199 bp  |                            | insH            | insH                                                                                                                                                                                                                                                                                                                                                                                                                                                                                                                                                                                                                                                                                                                                                                                                                                                                                                                                                                                                                                                                                                                                                       |
| 11 | 749354   | C→A        | P17P (CCG→CCT)             | ybgO ←          | fimbrial-like adhesin protein                                                                                                                                                                                                                                                                                                                                                                                                                                                                                                                                                                                                                                                                                                                                                                                                                                                                                                                                                                                                                                                                                                                              |
| 12 | 758440   | C→A        | F110L (TTC→TTA)            | sdhB →          | succinate dehydrogenase, FeS subunit                                                                                                                                                                                                                                                                                                                                                                                                                                                                                                                                                                                                                                                                                                                                                                                                                                                                                                                                                                                                                                                                                                                       |
| 13 | 887234   | C→A        | A176A (GCG→GCT)            | ybjJ ←          | transporter                                                                                                                                                                                                                                                                                                                                                                                                                                                                                                                                                                                                                                                                                                                                                                                                                                                                                                                                                                                                                                                                                                                                                |
| 14 | 987574   | G→T        | intergenic (-170/+433)     | ompF ← / ← asnS | outer membrane porin 1a (la;b;F)/asparaginyl tRNA synthetase                                                                                                                                                                                                                                                                                                                                                                                                                                                                                                                                                                                                                                                                                                                                                                                                                                                                                                                                                                                                                                                                                               |
| 15 | 1093686  | T→C        | V130A (GTA→GCA)            | ycdT →          | diguanylate cyclase                                                                                                                                                                                                                                                                                                                                                                                                                                                                                                                                                                                                                                                                                                                                                                                                                                                                                                                                                                                                                                                                                                                                        |
| 16 | 1170573  | C→T        | intergenic (-164/-77)      | ycfQ ← / → ycfR | DNA-binding transcriptional regulator/hypothetical protein                                                                                                                                                                                                                                                                                                                                                                                                                                                                                                                                                                                                                                                                                                                                                                                                                                                                                                                                                                                                                                                                                                 |
| 17 | 1301041  | Δ1,336 bp  |                            | insC-insD       | insC, insD                                                                                                                                                                                                                                                                                                                                                                                                                                                                                                                                                                                                                                                                                                                                                                                                                                                                                                                                                                                                                                                                                                                                                 |
| 18 | 1318876  | G→A        | P21S (CCT→TCT)             | trpA ←          | tryptophan synthase subunit alpha                                                                                                                                                                                                                                                                                                                                                                                                                                                                                                                                                                                                                                                                                                                                                                                                                                                                                                                                                                                                                                                                                                                          |
| 19 | 1413639  | Δ23,060 bp |                            | [ydaO]-ynaE     | 30 genes: [ydaO], intR, ydaQ, ydaC, lar, recT, recE, racC, ydaE, kil, sieB, ydaF, ydaG, racR, ydaS, ydaT, ydaU, ydaV, ydaW, rzpR, rzoR, trkG, ynaK, ydaY, ynaA, insH, stfR, tfaR, pinR, ynaE[ydaO], intR, ydaQ, ydaC, lar, recT, recE, racC, ydaE, kil, sieB, ydaF, ydaG, racR, ydaS, ydaT, ydaU, ydaV, ydaW, rzpR, rzoR, trkG, ynaK, ydaY, ynaA, insH, stfR, tfaR, pinR, ynaE                                                                                                                                                                                                                                                                                                                                                                                                                                                                                                                                                                                                                                                                                                                                                                             |
| 20 | 1483588  | G→A        | L322L (CTG→CTA)            | ynbD →          | phosphatase, inner membrane protein                                                                                                                                                                                                                                                                                                                                                                                                                                                                                                                                                                                                                                                                                                                                                                                                                                                                                                                                                                                                                                                                                                                        |
| 21 | 1496775  | Δ1 bp      | coding (11/924 nt)         | ydcI ←          | DNA-binding transcriptional regulator                                                                                                                                                                                                                                                                                                                                                                                                                                                                                                                                                                                                                                                                                                                                                                                                                                                                                                                                                                                                                                                                                                                      |
| 22 | 1615814  | C→A        | D202Y (GAC→TAC)            | yneI ←          | aldehyde dehydrogenase                                                                                                                                                                                                                                                                                                                                                                                                                                                                                                                                                                                                                                                                                                                                                                                                                                                                                                                                                                                                                                                                                                                                     |
| 23 | 1669599  | Δ1 bp      | coding (680/1221 nt)       | dgsA ←          | DNA-binding transcriptional repressor                                                                                                                                                                                                                                                                                                                                                                                                                                                                                                                                                                                                                                                                                                                                                                                                                                                                                                                                                                                                                                                                                                                      |
| 24 | 1844073  | G→A        | intergenic (-224/-12)      | ynjH ← / → gdhA | hypothetical protein/glutamate dehydrogenase, NADP-specific                                                                                                                                                                                                                                                                                                                                                                                                                                                                                                                                                                                                                                                                                                                                                                                                                                                                                                                                                                                                                                                                                                |
| 25 | 1918872  | T→A        | S301T (TCC→ACC)            | yebS →          | inner membrane protein                                                                                                                                                                                                                                                                                                                                                                                                                                                                                                                                                                                                                                                                                                                                                                                                                                                                                                                                                                                                                                                                                                                                     |
| 26 | 1973476  | G→A        | L310L (CTC→CTT)            | tar ←           | methyl-accepting chemotaxis protein II                                                                                                                                                                                                                                                                                                                                                                                                                                                                                                                                                                                                                                                                                                                                                                                                                                                                                                                                                                                                                                                                                                                     |
| 27 | 2005401  | C→T        | E115K (GAA→AAA)            | fliC ←          | flagellar filament structural protein                                                                                                                                                                                                                                                                                                                                                                                                                                                                                                                                                                                                                                                                                                                                                                                                                                                                                                                                                                                                                                                                                                                      |
| 28 | 2170094  | C→A        | intergenic (-437/+32)      | ogrK ← / ← yegR | DNA-binding transcriptional regulator/hypothetical protein                                                                                                                                                                                                                                                                                                                                                                                                                                                                                                                                                                                                                                                                                                                                                                                                                                                                                                                                                                                                                                                                                                 |
| 29 | 2320795  | Δ1,336 bp  |                            | insD-insC       | insD, insC                                                                                                                                                                                                                                                                                                                                                                                                                                                                                                                                                                                                                                                                                                                                                                                                                                                                                                                                                                                                                                                                                                                                                 |
| 30 | 2406075  | C→T        | V51I (GTT→ATT)             | nuoF ←          | NADH:ubiquinone oxidoreductase, chain F                                                                                                                                                                                                                                                                                                                                                                                                                                                                                                                                                                                                                                                                                                                                                                                                                                                                                                                                                                                                                                                                                                                    |
| 31 | 2416102  | G→A        | L233L (CTG→TTG)            | yfbS ←          | transporter                                                                                                                                                                                                                                                                                                                                                                                                                                                                                                                                                                                                                                                                                                                                                                                                                                                                                                                                                                                                                                                                                                                                                |
| 32 | 2538628  | C→T        | T258T (ACC→ACT)            | cysK →          | cysteine synthase A, O-acetylserine sulfhydrylase A subunit                                                                                                                                                                                                                                                                                                                                                                                                                                                                                                                                                                                                                                                                                                                                                                                                                                                                                                                                                                                                                                                                                                |
| 33 | 2865274  | +46 bp     | coding (817/876 nt)        | rpoS ←          | RNA polymerase, sigma S (sigma 38) factor                                                                                                                                                                                                                                                                                                                                                                                                                                                                                                                                                                                                                                                                                                                                                                                                                                                                                                                                                                                                                                                                                                                  |
| 34 | 2866111  | A→G        | intergenic (-21/+159)      | rpoS ← / ← nlpD | RNA polymerase, sigma S (sigma 38) factor/outer membrane lipoprotein                                                                                                                                                                                                                                                                                                                                                                                                                                                                                                                                                                                                                                                                                                                                                                                                                                                                                                                                                                                                                                                                                       |
| 35 | 3003330  | G→A        | L371L (CTC→CTT)            | ygeV ←          | DNA-binding transcriptional regulator                                                                                                                                                                                                                                                                                                                                                                                                                                                                                                                                                                                                                                                                                                                                                                                                                                                                                                                                                                                                                                                                                                                      |
| 36 | 3049815  | G→T        | R387S (CGC→AGC)            | visC ←          | oxidoreductase                                                                                                                                                                                                                                                                                                                                                                                                                                                                                                                                                                                                                                                                                                                                                                                                                                                                                                                                                                                                                                                                                                                                             |
| 37 | 3397813  | C→G        | D141H (GAT→CAT)            | yhdE ←          | hypothetical protein                                                                                                                                                                                                                                                                                                                                                                                                                                                                                                                                                                                                                                                                                                                                                                                                                                                                                                                                                                                                                                                                                                                                       |
| 38 | 3742936  | Δ1,336 bp  |                            | insD-insC       | insD, insC                                                                                                                                                                                                                                                                                                                                                                                                                                                                                                                                                                                                                                                                                                                                                                                                                                                                                                                                                                                                                                                                                                                                                 |
| 39 | 3746911  | Δ1,199 bp  |                            | insH            | insH                                                                                                                                                                                                                                                                                                                                                                                                                                                                                                                                                                                                                                                                                                                                                                                                                                                                                                                                                                                                                                                                                                                                                       |
| 40 | 3750122  | Δ1 bp      | coding (365/1416 nt)       | tnaA ←          | tryptophanase/L-cysteine desulfhydrase, PLP-dependent                                                                                                                                                                                                                                                                                                                                                                                                                                                                                                                                                                                                                                                                                                                                                                                                                                                                                                                                                                                                                                                                                                      |
| 41 | 3898657  | C→G        | L259V (CTG→GTG)            | yiaJ →          | DNA-binding transcriptional repressor                                                                                                                                                                                                                                                                                                                                                                                                                                                                                                                                                                                                                                                                                                                                                                                                                                                                                                                                                                                                                                                                                                                      |
| 42 | 3958123  | Δ34 bp     | coding (1156-1189/1287 nt) | dctA →          | C4-dicarboxylic acid, orotate and citrate transporter                                                                                                                                                                                                                                                                                                                                                                                                                                                                                                                                                                                                                                                                                                                                                                                                                                                                                                                                                                                                                                                                                                      |
| 43 | 4090749  | A→T        | Q135L (CAG→CTG)            | malQ →          | 4-alpha-glucanotransferase                                                                                                                                                                                                                                                                                                                                                                                                                                                                                                                                                                                                                                                                                                                                                                                                                                                                                                                                                                                                                                                                                                                                 |
| 44 | 4165991  | A→C        | K43T (AAA→ACA)             | rpsL →          | 30S ribosomal protein S12                                                                                                                                                                                                                                                                                                                                                                                                                                                                                                                                                                                                                                                                                                                                                                                                                                                                                                                                                                                                                                                                                                                                  |
| 45 | 4310363  | Δ1,199 bp  |                            | insH-[alsK]     | insH, [alsK]                                                                                                                                                                                                                                                                                                                                                                                                                                                                                                                                                                                                                                                                                                                                                                                                                                                                                                                                                                                                                                                                                                                                               |
| 46 | 4371271  | Δ2 bp      | intergenic (-6/+299)       | dcuA ← / ← aspA | C4-dicarboxylate antiporter/aspartate ammonia-lyase                                                                                                                                                                                                                                                                                                                                                                                                                                                                                                                                                                                                                                                                                                                                                                                                                                                                                                                                                                                                                                                                                                        |
| 47 | 4546535  | T→A        | intergenic (+296/-182)     | fimB → / → fimE | tyrosine recombinase/inversion of on/off regulator of fimA/tyrosine recombinase/inversion of on/off regulator of fimA                                                                                                                                                                                                                                                                                                                                                                                                                                                                                                                                                                                                                                                                                                                                                                                                                                                                                                                                                                                                                                      |
