# Supplementary material for: Genomewide Mutational Diversity in Escherichia coli Population Evolving in Prolonged Stationary Phase
Source: PubMed Central journal article supplement (PMC5444009; doi:10.1128/msphere.00059-17), 2017-05-24
Supplement: sph003172291st2.pdf [file sph003172291st2.pdf]

| <b>Aliphatic</b> | <b>Aromatic</b> | <b>Polar</b> | <b>Positive</b> | <b>Negative</b> | <b>Special</b> |
|------------------|-----------------|--------------|-----------------|-----------------|----------------|
| Ala              | Phe             | Ser          | Lys             | Asp             | Gly            |
| Val              | Tyr             | Thr          | Arg             | Glu             | Pro            |
| Leu              | Trp             | Asn          |                 |                 |                |
| Ile              | His             | Gln          |                 |                 |                |
| Met              |                 |              |                 |                 |                |
| Cys              |                 |              |                 |                 |                |
